# Supplementary material for: Dominant Antiviral CD8+ T Cell Responses Empower Prophylactic Antibody-Eliciting Vaccines Against Cytomegalovirus
Source: PubMed Central journal article supplement (PMC8828907; doi:10.3389/fimmu.2022.680559), 2022-01-27

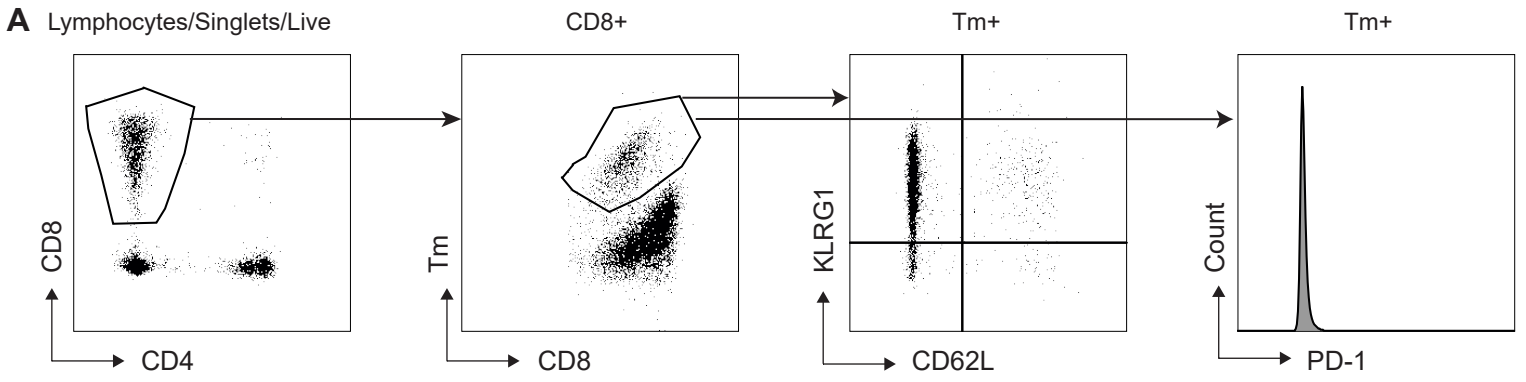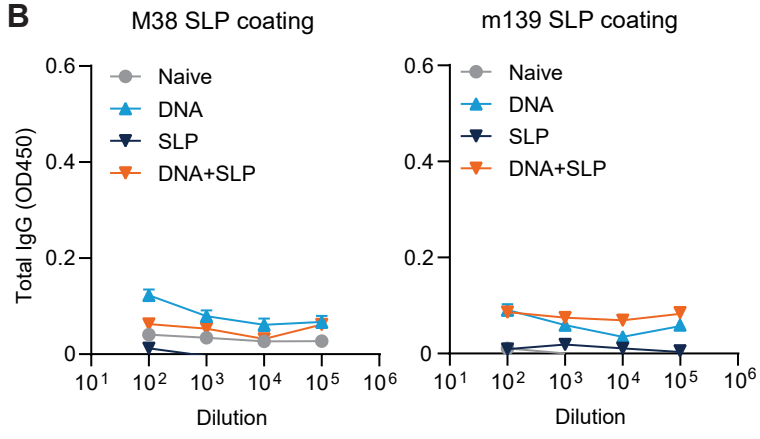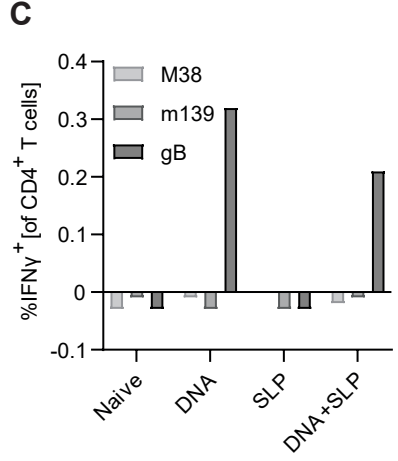

Supplement: DataSheet_1.pdf [file DataSheet_1.pdf]
